# Supplementary material for: Defense Regulatory Network Associated with circRNA in Rice in Response to Brown Planthopper Infestation
Source: MDPI journal article supplement (doi:10.3390/plants13030373), 2024-01-26
Supplement: s1 [file s1]

---

## Supplementary Figures and Tables

**Figure S1.** K-means clustering analysis and SOM clustering analysis.

**Table S1.** Summary of circRNAs sequencing results in three rice samples.

**Table S2.** Top 20 most abundant circRNAs expressed in the four libraries (TPM were shown).

**Table S3.** List of the DE circRNA identified in IR56 rice.

**Table S4.** Specific information regarding predicted miRNA and circRNA binding sites

**Table S5.** List of the predicted targets having a putative defense modulatory role in rice.

**Table S6.** List of the primers used in qPCR for miRNA and target gene expression analysis.

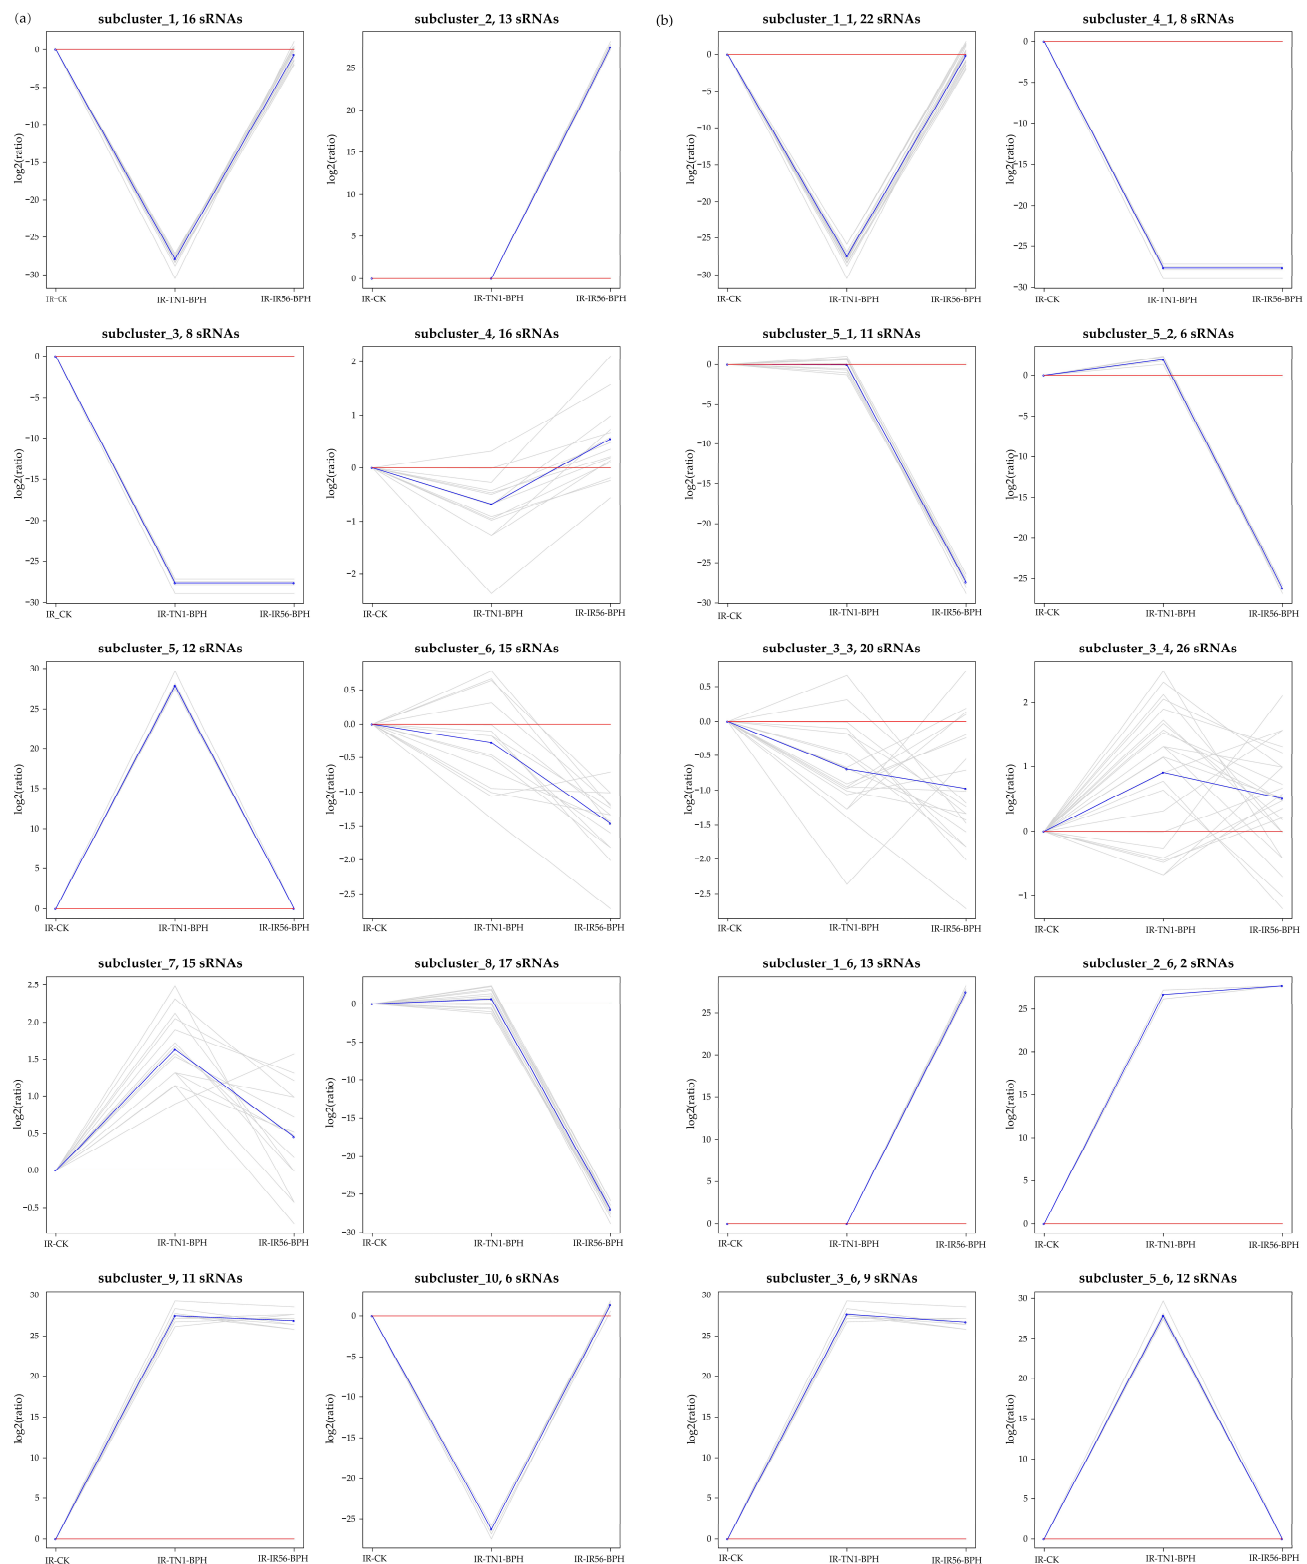

**Figure S1. K-means clustering analysis and SOM clustering analysis.** (a) K\_means\_clustering. (b) SOM clustering. Each subplot in the figure showcases a cluster of circRNA, where the grey lines represent the line graphs depicting the relative expression levels under different experimental conditions. The blue line signifies the trend within this particular

cluster. The gray lines in each subgraph represent line plots of the relative expression of circRNAs in a cluster under different experimental conditions. The blue line represents a line plot of the mean values of the relative expressions of all circRNAs in this cluster under different experimental conditions. Red line is for reference, online is up, offline is down. The X-axis represents the experimental conditions, and the Y-axis represents the relative expression.

**Table S1.** Summary of circRNAs sequencing results in three rice samples.

| Sample      | Raw counts | Clean Reads | Mapped reads(100%)   | Uniquely mapped      | Multiple mapped      | Clean bases | Error_rate(%) | Q20(%) | Q30(%) | GC_content(%) |
|-------------|------------|-------------|----------------------|----------------------|----------------------|-------------|---------------|--------|--------|---------------|
| IR_CK       | 106174788  | 101459300   | 89434355<br>(88.15%) | 76512867(75.4<br>1%) | 12921488<br>(12.74%) | 15.22<br>G  | 0.02          | 96.73  | 91.8   | 48.9          |
| IR_IR56-BPH | 95701674   | 91463396    | 80759198<br>(88.30%) | 68008974(74.3<br>6%) | 12750224<br>(13.94%) | 13.72<br>G  | 0.02          | 96.7   | 91.75  | 47.93         |
| IR_TN1-BPH  | 95646838   | 91019610    | 75616018<br>(83.08%) | 65652190(72.1<br>3%) | 9963828<br>(10.95%)  | 13.65<br>G  | 0.02          | 96.38  | 91.09  | 48.45         |

**Table S2.** Top 20 most abundant circRNAs expressed in the four libraries (TPM were shown).

| circRNA.readcount  | IR56_CK      | circRNA.readcount  | IR56_IR     | circRNA.readcount  | IR56_TN     |
|--------------------|--------------|--------------------|-------------|--------------------|-------------|
| novel_circ_0000588 | 311084.2646  | novel_circ_0000588 | 344011.976  | novel_circ_0000588 | 263888.8889 |
| novel_circ_0000835 | 73995.77167  | novel_circ_0000835 | 72155.68862 | novel_circ_0000835 | 79954.95495 |
| novel_circ_0000577 | 34128.66204  | novel_circ_0000577 | 38922.15569 | novel_circ_0000442 | 61186.18619 |
| novel_circ_0000442 | 31410.45002  | novel_circ_0000442 | 35329.34132 | novel_circ_0000445 | 33408.40841 |
| novel_circ_0000539 | 29598.30867  | novel_circ_0000710 | 32335.32934 | novel_circ_0000424 | 27402.4024  |
| novel_circ_0000355 | 28994.26155  | novel_circ_0000539 | 26047.90419 | novel_circ_0000539 | 25900.9009  |
| novel_circ_0000079 | 25672.00242  | novel_circ_0000355 | 21856.28743 | novel_circ_0000355 | 23273.27327 |
| novel_circ_0000424 | 23557.83751  | novel_circ_0000445 | 19760.47904 | novel_circ_0000577 | 21396.3964  |
| novel_circ_0000614 | 22349.74328  | novel_circ_0000414 | 19461.07784 | novel_circ_0000079 | 16141.14114 |
| novel_circ_0000414 | 19027.4 8414 | novel_circ_0000614 | 19461.07784 | novel_circ_0000614 | 15390.39039 |
| novel_circ_0000445 | 16913.31924  | novel_circ_0000424 | 17065.86826 | novel_circ_0000414 | 14639.63964 |
| novel_circ_0000710 | 15101.17789  | novel_circ_0000444 | 17065.86826 | novel_circ_0000444 | 14639.63964 |
| novel_circ_0000842 | 13289.03654  | novel_circ_0000079 | 15868.26347 | novel_circ_0000065 | 10510.51051 |
| novel_circ_0000444 | 12987.01299  | novel_circ_0000842 | 11676.64671 | novel_circ_0000803 | 10510.51051 |
| novel_circ_0000065 | 10872.84808  | novel_circ_0000065 | 8682.634731 | novel_circ_0000029 | 9384.384384 |
| novel_circ_0000803 | 10268.80097  | novel_circ_0000803 | 8682.634731 | novel_circ_0000210 | 9384.384384 |
| novel_circ_0000415 | 9664.753851  | novel_circ_0000210 | 8383.233533 | novel_circ_0000571 | 9384.384384 |
| novel_circ_0000210 | 7248.565388  | novel_circ_0000472 | 7185.628743 | novel_circ_0000413 | 8633.633634 |
| novel_circ_0000571 | 6946.54183   | novel_circ_0000029 | 6586.826347 | novel_circ_0000627 | 8633.633634 |
| novel_circ_0000177 | 6342.494715  | novel_circ_0000415 | 6586.826347 | novel_circ_0000133 | 8258.258258 |

**Table S3.** List of the DE circRNA identified in IR56 rice.

| ID                 | IR56_IR  | IR56_CK  | log2.Fold_change. | p.value   | q.value   |
|--------------------|----------|----------|-------------------|-----------|-----------|
| novel_circ_0000503 | 0        | 4905.958 | -13.26            | 0         | 0         |
| novel_circ_0000559 | 940.0277 | 3463.029 | -1.8813           | 0         | 0         |
| novel_circ_0000746 | 0        | 4617.373 | -13.173           | 0         | 0         |
| novel_circ_0000771 | 626.6852 | 3751.615 | -2.5817           | 0         | 0         |
| novel_circ_0000783 | 940.0277 | 3463.029 | -1.8813           | 0         | 0         |
| novel_circ_0000675 | 0        | 2597.272 | -12.343           | 3.28E-295 | 3.37E-295 |
| novel_circ_0000189 | 1253.37  | 3463.029 | -1.4662           | 1.31E-280 | 1.25E-280 |
| novel_circ_0000714 | 0        | 2308.686 | -12.173           | 5.64E-271 | 4.43E-271 |
| novel_circ_0000134 | 0        | 2020.101 | -11.98            | 8.46E-246 | 4.92E-246 |
| novel_circ_0000541 | 0        | 2020.101 | -11.98            | 8.46E-246 | 4.92E-246 |
| novel_circ_0000870 | 0        | 2020.101 | -11.98            | 8.46E-246 | 4.92E-246 |
| novel_circ_0000133 | 2193.398 | 4617.373 | -1.0739           | 1.65E-244 | 9.19E-245 |
| novel_circ_0000093 | 1253.37  | 3174.444 | -1.3407           | 1.77E-228 | 8.73E-229 |
| novel_circ_0000490 | 1253.37  | 3174.444 | -1.3407           | 1.77E-228 | 8.73E-229 |
| novel_circ_0000120 | 0        | 1731.515 | -11.758           | 1.63E-219 | 6.06E-220 |
| novel_circ_0000408 | 0        | 1731.515 | -11.758           | 1.63E-219 | 6.06E-220 |
| novel_circ_0000521 | 0        | 1731.515 | -11.758           | 1.63E-219 | 6.06E-220 |
| novel_circ_0000048 | 626.6852 | 2020.101 | -1.6886           | 4.01E-197 | 1.31E-197 |
| novel_circ_0000308 | 626.6852 | 2020.101 | -1.6886           | 4.01E-197 | 1.31E-197 |
| novel_circ_0000433 | 626.6852 | 2020.101 | -1.6886           | 4.01E-197 | 1.31E-197 |
| novel_circ_0000142 | 0        | 1442.929 | -11.495           | 6.95E-192 | 1.66E-192 |
| novel_circ_0000339 | 0        | 1442.929 | -11.495           | 6.95E-192 | 1.66E-192 |
| novel_circ_0000454 | 0        | 1442.929 | -11.495           | 6.95E-192 | 1.66E-192 |
| novel_circ_0000518 | 0        | 1442.929 | -11.495           | 6.95E-192 | 1.66E-192 |
| novel_circ_0000658 | 0        | 1442.929 | -11.495           | 6.95E-192 | 1.66E-192 |
| novel_circ_0000696 | 0        | 1442.929 | -11.495           | 6.95E-192 | 1.66E-192 |
| novel_circ_0000827 | 0        | 1442.929 | -11.495           | 6.95E-192 | 1.66E-192 |
| novel_circ_0000483 | 1253.37  | 2885.858 | -1.2032           | 1.75E-179 | 4.02E-180 |
| novel_circ_0000855 | 0        | 1154.343 | -11.173           | 1.43E-162 | 3.18E-163 |

|                    |          |          |         |           |           |
|--------------------|----------|----------|---------|-----------|-----------|
| novel_circ_0000892 | 0        | 1154.343 | -11.173 | 1.43E-162 | 3.18E-163 |
| novel_circ_0000128 | 940.0277 | 2308.686 | -1.2963 | 2.86E-159 | 6.26E-160 |
| novel_circ_0000463 | 1253.37  | 2597.272 | -1.0512 | 3.37E-134 | 6.72E-135 |
| novel_circ_0000165 | 0        | 865.7574 | -10.758 | 4.88E-131 | 9.05E-132 |
| novel_circ_0000305 | 0        | 865.7574 | -10.758 | 4.88E-131 | 9.05E-132 |
| novel_circ_0000643 | 0        | 865.7574 | -10.758 | 4.88E-131 | 9.05E-132 |
| novel_circ_0000677 | 940.0277 | 2020.101 | -1.1037 | 4.46E-112 | 7.84E-113 |
| novel_circ_0000063 | 0        | 577.1716 | -10.173 | 2.48E-96  | 3.99E-97  |
| novel_circ_0000673 | 0        | 577.1716 | -10.173 | 2.48E-96  | 3.99E-97  |
| novel_circ_0000770 | 0        | 577.1716 | -10.173 | 2.48E-96  | 3.99E-97  |
| novel_circ_0000319 | 626.6852 | 1442.929 | -1.2032 | 1.20E-90  | 1.78E-91  |
| novel_circ_0000373 | 626.6852 | 1442.929 | -1.2032 | 1.20E-90  | 1.78E-91  |
| novel_circ_0000496 | 626.6852 | 1442.929 | -1.2032 | 1.20E-90  | 1.78E-91  |
| novel_circ_0000605 | 626.6852 | 1442.929 | -1.2032 | 1.20E-90  | 1.78E-91  |
| novel_circ_0000480 | 3133.426 | 0        | 12.614  | 0         | 0         |
| novel_circ_0000575 | 4073.454 | 865.7574 | 2.2342  | 0         | 0         |
| novel_circ_0000710 | 33841    | 14429.29 | 1.2298  | 0         | 0         |
| novel_circ_0000889 | 4073.454 | 0        | 12.992  | 0         | 0         |
| novel_circ_0000151 | 5013.481 | 1731.515 | 1.5338  | 6.65E-306 | 7.40E-306 |
| novel_circ_0000813 | 2506.741 | 0        | 12.292  | 9.37E-276 | 8.34E-276 |
| novel_circ_0000536 | 3760.111 | 1154.343 | 1.7037  | 6.61E-272 | 5.52E-272 |
| novel_circ_0000080 | 2193.398 | 0        | 12.099  | 4.88E-250 | 3.26E-250 |
| novel_circ_0000625 | 2193.398 | 0        | 12.099  | 4.88E-250 | 3.26E-250 |
| novel_circ_0000830 | 2193.398 | 0        | 12.099  | 4.88E-250 | 3.26E-250 |
| novel_circ_0000071 | 1880.055 | 0        | 11.877  | 3.39E-223 | 1.37E-223 |
| novel_circ_0000317 | 1880.055 | 0        | 11.877  | 3.39E-223 | 1.37E-223 |
| novel_circ_0000462 | 1880.055 | 0        | 11.877  | 3.39E-223 | 1.37E-223 |
| novel_circ_0000582 | 1880.055 | 0        | 11.877  | 3.39E-223 | 1.37E-223 |
| novel_circ_0000766 | 1880.055 | 0        | 11.877  | 3.39E-223 | 1.37E-223 |
| novel_circ_0000576 | 2820.083 | 865.7574 | 1.7037  | 2.35E-204 | 8.28E-205 |
| novel_circ_0000069 | 1566.713 | 0        | 11.614  | 5.42E-195 | 1.48E-195 |
| novel_circ_0000103 | 1566.713 | 0        | 11.614  | 5.42E-195 | 1.48E-195 |
| novel_circ_0000152 | 1566.713 | 0        | 11.614  | 5.42E-195 | 1.48E-195 |
| novel_circ_0000213 | 1566.713 | 0        | 11.614  | 5.42E-195 | 1.48E-195 |
| novel_circ_0000335 | 1566.713 | 0        | 11.614  | 5.42E-195 | 1.48E-195 |
| novel_circ_0000461 | 1566.713 | 0        | 11.614  | 5.42E-195 | 1.48E-195 |
| novel_circ_0000749 | 1566.713 | 0        | 11.614  | 5.42E-195 | 1.48E-195 |
| novel_circ_0000869 | 1566.713 | 0        | 11.614  | 5.42E-195 | 1.48E-195 |
| novel_circ_0000389 | 2193.398 | 577.1716 | 1.9261  | 9.11E-192 | 2.13E-192 |
| novel_circ_0000371 | 1880.055 | 577.1716 | 1.7037  | 7.56E-137 | 1.55E-137 |
| novel_circ_0000801 | 1880.055 | 577.1716 | 1.7037  | 7.56E-137 | 1.55E-137 |
| novel_circ_0000074 | 940.0277 | 0        | 10.877  | 6.27E-133 | 1.21E-133 |
| novel_circ_0000271 | 940.0277 | 0        | 10.877  | 6.27E-133 | 1.21E-133 |
| novel_circ_0000810 | 2193.398 | 865.7574 | 1.3411  | 1.23E-107 | 2.14E-108 |
| novel_circ_0000223 | 626.6852 | 0        | 10.292  | 1.43E-97  | 2.39E-98  |
| novel_circ_0000270 | 626.6852 | 0        | 10.292  | 1.43E-97  | 2.39E-98  |
| novel_circ_0000820 | 626.6852 | 0        | 10.292  | 1.43E-97  | 2.39E-98  |
| novel_circ_0000768 | 2506.741 | 1154.343 | 1.1187  | 7.02E-89  | 1.03E-89  |
| novel_circ_0000028 | 1566.713 | 577.1716 | 1.4407  | 2.47E-87  | 3.51E-88  |
| novel_circ_0000522 | 1566.713 | 577.1716 | 1.4407  | 2.47E-87  | 3.51E-88  |
| novel_circ_0000602 | 1566.713 | 577.1716 | 1.4407  | 2.47E-87  | 3.51E-88  |
| novel_circ_0000560 | 1880.055 | 865.7574 | 1.1187  | 4.21E-67  | 5.41E-68  |
| novel_circ_0000590 | 1253.37  | 577.1716 | 1.1187  | 2.57E-45  | 2.96E-46  |

---

| ID | IR56_TN | IR56_CK | log2.Fold_change. | p.value | q.valu<br>e |
|----|---------|---------|-------------------|---------|-------------|
|----|---------|---------|-------------------|---------|-------------|

|                    |          |          |         |           |           |
|--------------------|----------|----------|---------|-----------|-----------|
| novel_circ_0000365 | 0        | 5070.749 | -13.308 | 0         | 0         |
| novel_circ_0000415 | 1788.646 | 10141.5  | -2.5033 | 0         | 0         |
| novel_circ_0000490 | 0        | 3486.14  | -12.767 | 0         | 0         |
| novel_circ_0000503 | 0        | 5387.671 | -13.395 | 0         | 0         |
| novel_circ_0000559 | 0        | 3803.062 | -12.893 | 0         | 0         |
| novel_circ_0000710 | 0        | 15846.09 | -14.952 | 0         | 0         |
| novel_circ_0000842 | 6439.126 | 13944.56 | -1.1148 | 0         | 0         |
| novel_circ_0000868 | 0        | 2852.297 | -12.478 | 1.11E-302 | 5.69E-303 |
| novel_circ_0000089 | 0        | 2535.375 | -12.308 | 9.59E-278 | 3.62E-278 |
| novel_circ_0000356 | 0        | 2535.375 | -12.308 | 9.59E-278 | 3.62E-278 |
| novel_circ_0000714 | 0        | 2535.375 | -12.308 | 9.59E-278 | 3.62E-278 |
| novel_circ_0000760 | 0        | 2535.375 | -12.308 | 9.59E-278 | 3.62E-278 |
| novel_circ_0000007 | 0        | 2218.453 | -12.115 | 7.58E-252 | 2.12E-252 |
| novel_circ_0000303 | 0        | 2218.453 | -12.115 | 7.58E-252 | 2.12E-252 |
| novel_circ_0000308 | 0        | 2218.453 | -12.115 | 7.58E-252 | 2.12E-252 |
| novel_circ_0000541 | 0        | 2218.453 | -12.115 | 7.58E-252 | 2.12E-252 |
| novel_circ_0000870 | 0        | 2218.453 | -12.115 | 7.58E-252 | 2.12E-252 |
| novel_circ_0000771 | 1430.917 | 4119.984 | -1.5257 | 8.36E-247 | 2.28E-247 |
| novel_circ_0000120 | 0        | 1901.531 | -11.893 | 8.15E-225 | 1.80E-225 |
| novel_circ_0000151 | 0        | 1901.531 | -11.893 | 8.15E-225 | 1.80E-225 |
| novel_circ_0000537 | 0        | 1901.531 | -11.893 | 8.15E-225 | 1.80E-225 |
| novel_circ_0000142 | 0        | 1584.609 | -11.63  | 2.06E-196 | 3.73E-197 |
| novel_circ_0000202 | 0        | 1584.609 | -11.63  | 2.06E-196 | 3.73E-197 |
| novel_circ_0000373 | 0        | 1584.609 | -11.63  | 2.06E-196 | 3.73E-197 |
| novel_circ_0000496 | 0        | 1584.609 | -11.63  | 2.06E-196 | 3.73E-197 |
| novel_circ_0000518 | 0        | 1584.609 | -11.63  | 2.06E-196 | 3.73E-197 |
| novel_circ_0000605 | 0        | 1584.609 | -11.63  | 2.06E-196 | 3.73E-197 |
| novel_circ_0000696 | 0        | 1584.609 | -11.63  | 2.06E-196 | 3.73E-197 |
| novel_circ_0000797 | 0        | 1267.687 | -11.308 | 2.73E-166 | 4.44E-167 |
| novel_circ_0000243 | 1788.646 | 4119.984 | -1.2038 | 1.89E-163 | 3.03E-164 |
| novel_circ_0000828 | 1073.188 | 2852.297 | -1.4102 | 3.57E-150 | 5.58E-151 |

|                    |          |          |         |           |           |
|--------------------|----------|----------|---------|-----------|-----------|
| novel_circ_0000295 | 2146.375 | 4436.906 | -1.0477 | 1.02E-135 | 1.56E-136 |
| novel_circ_0000094 | 1788.646 | 3803.062 | -1.0883 | 2.75E-125 | 3.88E-126 |
| novel_circ_0000561 | 1788.646 | 3803.062 | -1.0883 | 2.75E-125 | 3.88E-126 |
| novel_circ_0000242 | 715.4585 | 1901.531 | -1.4102 | 1.02E-100 | 1.38E-101 |
| novel_circ_0000408 | 715.4585 | 1901.531 | -1.4102 | 1.02E-100 | 1.38E-101 |
| novel_circ_0000028 | 0        | 633.8437 | -10.308 | 2.71E-98  | 3.48E-99  |
| novel_circ_0000389 | 0        | 633.8437 | -10.308 | 2.71E-98  | 3.48E-99  |
| novel_circ_0000522 | 0        | 633.8437 | -10.308 | 2.71E-98  | 3.48E-99  |
| novel_circ_0000801 | 0        | 633.8437 | -10.308 | 2.71E-98  | 3.48E-99  |
| novel_circ_0000319 | 715.4585 | 1584.609 | -1.1472 | 1.27E-58  | 1.41E-59  |
| novel_circ_0000454 | 715.4585 | 1584.609 | -1.1472 | 1.27E-58  | 1.41E-59  |
| novel_circ_0000063 | 2861.834 | 633.8437 | 2.1747  | 0         | 0         |
| novel_circ_0000180 | 6439.126 | 1267.687 | 2.3447  | 0         | 0         |
| novel_circ_0000271 | 3219.563 | 0        | 12.653  | 0         | 0         |
| novel_circ_0000273 | 2861.834 | 0        | 12.483  | 0         | 0         |
| novel_circ_0000413 | 8227.772 | 0        | 14.006  | 0         | 0         |
| novel_circ_0000426 | 4292.751 | 1584.609 | 1.4378  | 0         | 0         |
| novel_circ_0000590 | 2861.834 | 633.8437 | 2.1747  | 0         | 0         |
| novel_circ_0000810 | 3577.292 | 950.7655 | 1.9117  | 0         | 0         |
| novel_circ_0000889 | 6081.397 | 0        | 13.57   | 0         | 0         |
| novel_circ_0000890 | 6439.126 | 2218.453 | 1.5373  | 0         | 0         |
| novel_circ_0000892 | 5365.938 | 1267.687 | 2.0816  | 0         | 0         |
| novel_circ_0000325 | 2504.105 | 633.8437 | 1.9821  | 9.18E-299 | 4.53E-299 |
| novel_circ_0000101 | 2504.105 | 0        | 12.29   | 7.25E-288 | 3.21E-288 |
| novel_circ_0000138 | 2504.105 | 0        | 12.29   | 7.25E-288 | 3.21E-288 |
| novel_circ_0000631 | 5723.668 | 2852.297 | 1.0048  | 1.54E-279 | 6.59E-280 |
| novel_circ_0000305 | 2861.834 | 950.7655 | 1.5898  | 3.13E-260 | 1.12E-260 |
| novel_circ_0000899 | 2861.834 | 950.7655 | 1.5898  | 3.13E-260 | 1.12E-260 |
| novel_circ_0000108 | 2146.375 | 0        | 12.068  | 2.73E-257 | 8.55E-258 |
| novel_circ_0000150 | 2146.375 | 0        | 12.068  | 2.73E-257 | 8.55E-258 |
| novel_circ_0000230 | 2146.375 | 0        | 12.068  | 2.73E-257 | 8.55E-258 |
| novel_circ_0000403 | 2146.375 | 0        | 12.068  | 2.73E-257 | 8.55E-258 |
| novel_circ_0000820 | 2146.375 | 0        | 12.068  | 2.73E-257 | 8.55E-258 |



---

|                    |          |          |        |           |           |
|--------------------|----------|----------|--------|-----------|-----------|
| novel_circ_0000074 | 1788.646 | 0        | 11.805 | 3.98E-225 | 9.28E-226 |
| novel_circ_0000078 | 1788.646 | 0        | 11.805 | 3.98E-225 | 9.28E-226 |
| novel_circ_0000174 | 1788.646 | 0        | 11.805 | 3.98E-225 | 9.28E-226 |
| novel_circ_0000188 | 1788.646 | 0        | 11.805 | 3.98E-225 | 9.28E-226 |
| novel_circ_0000223 | 1788.646 | 0        | 11.805 | 3.98E-225 | 9.28E-226 |
| novel_circ_0000239 | 1788.646 | 0        | 11.805 | 3.98E-225 | 9.28E-226 |
| novel_circ_0000270 | 1788.646 | 0        | 11.805 | 3.98E-225 | 9.28E-226 |
| novel_circ_0000602 | 2146.375 | 633.8437 | 1.7597 | 3.60E-222 | 7.57E-223 |
| novel_circ_0000673 | 2146.375 | 633.8437 | 1.7597 | 3.60E-222 | 7.57E-223 |
| novel_circ_0000770 | 2146.375 | 633.8437 | 1.7597 | 3.60E-222 | 7.57E-223 |
| novel_circ_0000737 | 3577.292 | 1584.609 | 1.1747 | 2.04E-217 | 4.16E-218 |
| novel_circ_0000205 | 2504.105 | 950.7655 | 1.3971 | 1.00E-192 | 1.79E-193 |
| novel_circ_0000335 | 1430.917 | 0        | 11.483 | 5.69E-191 | 9.74E-192 |
| novel_circ_0000749 | 1430.917 | 0        | 11.483 | 5.69E-191 | 9.74E-192 |
| novel_circ_0000830 | 1430.917 | 0        | 11.483 | 5.69E-191 | 9.74E-192 |
| novel_circ_0000286 | 2861.834 | 1267.687 | 1.1747 | 2.88E-174 | 4.87E-175 |
| novel_circ_0000103 | 1073.188 | 0        | 11.068 | 3.49E-154 | 5.53E-155 |
| novel_circ_0000165 | 2146.375 | 950.7655 | 1.1747 | 3.82E-131 | 5.63E-132 |
| novel_circ_0000560 | 2146.375 | 950.7655 | 1.1747 | 3.82E-131 | 5.63E-132 |
| novel_circ_0000625 | 715.4585 | 0        | 10.483 | 1.27E-113 | 1.75E-114 |

---

**Table S4.** Specific information regarding predicted miRNA and circRNA binding sites.

| miRNA_ID        | target_circRNA                  | Target_aligned_fragment | match | miRNA_aligned_fragment   |
|-----------------|---------------------------------|-------------------------|-------|--------------------------|
| osa-miR396c-3p  | novel_circ_0000319              | CUCUCAAAGCUUUCU-GACG    |       | GAAGGGUGUCGAAA-GAACUGG   |
| osa-miR166i-3p  | novel_circ_0000305_junction_seq | GGUGACCUGAA-GCCUGGUUCGG |       | CUCCUU-ACUUCGGAC-UAGGCU  |
| osa-miR166e-5p  | novel_circ_0000490              | CCUUGA-CGAGAUAAAAUUC    |       | GGAACUUGGUCUGUUGU-AAGG   |
| osa-miR5837.2   | novel_circ_0000114              | UGCUUAAUG-UCCACAUAACC   |       | ACGGCUUGCGAGGUG-UAGUGG   |
| osa-miR6249a    | novel_circ_0000065              | GUCUCUGGCGAGCUCUAC-GCC  |       | CGGCGGCCGCUCGAGAA-GUGC   |
| osa-miR439i     | novel_circ_0000604              | UCGAGCUGCCGCG-GAUCUACA  |       | AGCUUGUUGGCGCCAA-GCUGU   |
| osa-miR2102-5p  | novel_circ_0000871              | GCGGCGGCGGCGGCG-GCCG    |       | CACCGCCGCCCGCAACGGG      |
| osa-miR5535     | novel_circ_0000734              | AUGCGGGGUUGAAUCA-GCAGA  |       | UACGUCUGAAGUUAGUC-CGUCU  |
| osa-miR396b-5p  | novel_circ_0000403              | UAAUUGUAAGA-GAGCUGUUGAA |       | GUCAA-GUUCUUUCGACAC-CUU  |
| osa-miR395t     | novel_circ_0000453              | GCAUUUCCCCAA-CGCUUCAA   |       | CUCAAAGGGGUUUGUGAA-GUG   |
| osa-miR396g     | novel_circ_0000150              | CAGUACAGGAG-GAGCCUGUGGG |       | GGCAAGUUCUU-UCG-GACACCU  |
| osa-miR1862g    | novel_circ_0000189              | CCUAAACAAACCACCUUCAA    |       | GGUUUUUUUUGGUUGGA-GUA    |
| osa-miR535-3p   | novel_circ_0000576              | AGUG-CAACGGGAGGGUGCAG   |       | UCACUGUUGCCCU-CUUUCGUG   |
| osa-miR439a     | novel_circ_0000604              | UCGAGCUGCCGCG-GAUCUACA  |       | AGCUUGUUGGCGCCAA-GCUGU   |
| osa-miR396d     | novel_circ_0000150              | CAGUACAGGAG-GAGCCUGUGGG |       | GGCAAGUUCUU-UCG-GACACCU  |
| osa-miR11337-3p | novel_circ_0000627              | CGAGGACGAGUGUAAC-GAGGUC |       | GCUC-UGC UUAGAUUGCU-CUAU |
| osa-miR166l-3p  | novel_circ_0000305              | GUGACCUGAA-GCCUGGUUCGG  |       | UCCCUAACUUCGGAC-CAGGCU   |
| osa-miR1848     | novel_circ_0000503              | UACGUGCGCGCGCGUG-CGAGG  |       | ACGUGCGCGCGCGGC-CGCUCC   |
| osa-miR439c     | novel_circ_0000604              | UCGAGCUGCCGCG-GAUCUACA  |       | AGCUUGUUGGCGCCAA-GCUGU   |
| osa-miR5079a    | novel_circ_0000295              | AUGCCCACAUAGCAGAUG-CAAG |       | UAUGGUUUUAUUGUCUAGGUUU   |
| osa-miR5079a    | novel_circ_0000462              | AUUCUGGGCUAACAGA-CCAAA  |       | UAUGGUUUUAUUGUCUAGGUUU   |
| osa-miR5075     | novel_circ_0000604              | GUCGGCGGCGGCGAC-GAAGGC  |       | CGCCUGCCGCCGCUGCCU-CUU   |
| osa-miR5075     | novel_circ_0000007              | GCGGAUGGUG-GCGAGGGACAG  |       | CGCCUGCCGCCGCUGCCU-CUU   |
| osa-miR439h     | novel_circ_0000604              | UCGAGCUGCCGCG-GAUCUACA  |       | AGCUUGUUGGCGCCAA-GCUGU   |
| osa-miR5079b    | novel_circ_0000295              | AUGCCCACAUAGCAGAUG-CAAG |       | UAUGGUUUUAUUGUCUAGGUUU   |
| osa-miR5079b    | novel_circ_0000462              | AUUCUGGGCUAACAGA-CCAAA  |       | UAUGGUUUUAUUGUCUAGGUUU   |

|                 |                                      |                             |             |                          |
|-----------------|--------------------------------------|-----------------------------|-------------|--------------------------|
| osa-miR166a-5p  | novel_circ_0000490                   | CCUUGA-CGAGAUAAAAUUCC       | .....:..... | GGAACUUGGUCUGUUGU-AAGG   |
| osa-miR439d     | novel_circ_0000604                   | UCGAGCUGCCGCG-<br>GAUCUACA  | .....:..... | AGCUUGUUGGCGCCAA-GCUGU   |
| osa-miR2122     | novel_circ_0000005                   | GAGCAAGAGGUUAAUUC-<br>GAGA  | .....:..... | CUUGUUUCCAAUAAAAAC-UUU   |
| osa-miR5539a    | novel_circ_0000229                   | CGGCGCGCAC-<br>GUCCGUCUUCUU | .....:..... | AUCGUGCGCGUAGGCAAAA-GAA  |
| osa-miR5788     | novel_circ_0000074                   | UGCUCGGGAU-<br>GUUACAAUCCA  | .....:..... | AUGAUCUCAUACAGUGU-AGGU   |
| osa-miR396a-5p  | novel_circ_0000403                   | UAAUUGUAAGA-<br>GAGCUGUUGAA | .....:..... | GUCAA-GUUCUUUCGACAC-CUU  |
| osa-miR2093-3p  | novel_circ_0000658                   | AUCCAUCAAAUGGACA-<br>GAUGU  | .....:..... | UACGUAAUUAACCU-UCUACA    |
| osa-miR2905     | novel_circ_0000760                   | UAC-<br>CUUUUUUACUGAUUGCA   | .....:..... | ACGGAAACAGUGACUGUA-CAU   |
| osa-miR6249b    | novel_circ_0000065                   | GUCUCUGGCGAGCUCUAC-<br>GCC  | .....:..... | CGGCGGCGCUCGAGAA-GUGC    |
| osa-miR166m     | novel_circ_0000305                   | GUGACCUGAA-<br>GCCUGGUUCGG  | .....:..... | UCCCUUACUUCGGAC-CAGGCU   |
| osa-miR2931     | novel_circ_0000582                   | UUCUGAAAUCAGUAAGAAAG        | .....:..... | AAAACUGUAGUUGUUAUUUC     |
| osa-miR810a     | novel_circ_0000539                   | UCGCAUUUGGUGGGCU-AUAA       | .....:..... | GGUGUACAC-CACCCGAUACU    |
| osa-miR2876-3p  | novel_circ_0000093                   | GCAU-<br>UGGUAGUUCAUUGUGAA  | .....:..... | CGUUGUCA-CAAGUAUAUCCUU   |
| osa-miR439e     | novel_circ_0000604                   | UCGAGCUGCCGCG-<br>GAUCUACA  | .....:..... | AGCUUGUUGGCGCCAA-GCUGU   |
| osa-miR1862f    | novel_circ_0000189                   | CCUAAACAAACCACCUUCAA        | .....:..... | GGUUUUUUGGUUGGA-GUA      |
| osa-miR5539b    | novel_circ_0000229                   | CGGCGCGCAC-<br>GUCCGUCUUCUU | .....:..... | AUCGUGCGCGUAGGCAAAA-GAA  |
| osa-miR439f     | novel_circ_0000604                   | UCGAGCUGCCGCG-<br>GAUCUACA  | .....:..... | AGCUUGUUGGCGCCAA-GCUGU   |
| osa-miR11342-3p | novel_circ_0000627                   | UCUUCGAGGACGAGUGAAC-<br>GAG | .....:..... | AAACGCUC-UGCUUAGAU-UGCUC |
| osa-miR1440a    | novel_circ_0000781                   | AGGAAAUUGG-AGUUGAGCA        | .....:..... | UCCUCUCACCAUAAACUCGU     |
| osa-miR5081     | novel_circ_0000371                   | GCUAUUAAUUGC-ACU-<br>AAUUC  | .....:..... | UGAUAGUAAACGAUGUUU-AAU   |
| osa-miR413      | novel_circ_0000766                   | GUGCAGCAACAGUGGAAC-<br>CAC  | .....:..... | CACGUC-UUGUUCACU-UUGAUC  |
| osa-miR5809     | novel_circ_0000286                   | GACGUGG-CGCCGGUGAUGA        | .....:..... | CGACACCAGCGCCGCGUCU      |
| osa-miR5809     | novel_circ_0000604                   | GCAGUCGGCGGCGGCGACGA        | .....:..... | CGACACCAGCGCCGCGUCU      |
| osa-miR5077     | novel_circ_0000007                   | AGGUCAACCUGGCGGCGAAC        | .....:..... | ACCACUUGGGCUGC-GCUUG     |
| osa-miR2871b-3p | novel_circ_0000424                   | GUGACAA-GGAAGCUGAAAUC       | .....:..... | CACUGGUAUCUUUGAU-UUUAU   |
| osa-miR171i-3p  | novel_circ_0000313                   | UAUGUUGGCG-GGCUUGAUCC       | .....:..... | CUAUAACUGCGCCGAGUAGG     |
| osa-miR171i-3p  | novel_circ_0000313_junc-<br>tion_seq | UAUGUUGGCG-GGCUUGAUCC       | .....:..... | CUAUAACUGCGCCGAGUAGG     |
| osa-miR166k-3p  | novel_circ_0000305                   | GUGACCUGAA-<br>GCCUGGUUCGG  | .....:..... | UCCCUAACUUCGGAC-CAGGCU   |
| osa-miR439g     | novel_circ_0000604                   | UCGAGCUGCCGCG-<br>GAUCUACA  | .....:..... | AGCUUGUUGGCGCCAA-GCUGU   |
| osa-miR2924     | novel_circ_0000308                   | GAGGCGGAC-<br>GAGGCAGGCGAG  | .....:..... | CAC-CGCCGGCCUCGUUCGCUC   |
| osa-miR390-3p   | novel_circ_0000065                   | GGAGGAUCAGGA-<br>GAGGUAGUG  | .....:..... | CCUCG-AGUCCUAUCUAUCGC    |

|                 |                    |                         |                      |                         |
|-----------------|--------------------|-------------------------|----------------------|-------------------------|
| osa-miR2871a-3p | novel_circ_0000424 | GUGACAA-GGAAGCUGAAAUC   | ::: : :::::          | CACUGGUAUCUUUGAU-UUUUAU |
| osa-miR439b     | novel_circ_0000604 | UCGAGCUGCCGCG-GAUCUACA  | ::: : :::: : ::      | AGCUUGUUGGCGCCAA-GCUGU  |
| osa-miR1850.3   | novel_circ_0000093 | AAGAGUGUGGUGAACUA-GAUAA | ::: : ::::: : ::     | UUCUAACUACACUUGAU-UUGUC |
| osa-miR396h     | novel_circ_0000150 | CAGUACAGGAG-GAGCCUGUGGG | : : :::: : :::::     | GGCAAGUUCUU-UCG-GACACCU |
| osa-miR172d-5p  | novel_circ_0000536 | CUGAA-CGUGGUGGUGCUGG    | ::: : :::::          | CACUUAGAACUACCACGACG    |
| osa-miR166j-3p  | novel_circ_0000305 | GUGACCUGAA-GCCUGGUUCGG  | : : ::::: : ::       | CCCCUACUUCGGAC-CAGGCU   |
| osa-miR2118d    | novel_circ_0000065 | UAGUUGAGGGAGG-AUCAG-GAG | :: : :::: : :::::    | AUCCGUACCCUCCGUAGUCCUU  |
| osa-miR5522     | novel_circ_0000869 | AU-CCUGUAGUUCUAUUGUU    | : : : : :::::        | UACGGAGGGUAAGGAU-AACAA  |
| osa-miR2926     | novel_circ_0000229 | GGCGC-GGCGUCGACUACCU    | ::: : ::::: : ::     | UCGUGGUUGCAGCUGCUGGA    |
| osa-miR166f     | novel_circ_0000305 | GUGACCUGAA-GCCUGGUUCGG  | : : ::::: : ::       | CCCCUACUUCGGAC-CAGGCU   |
| osa-miR166b-3p  | novel_circ_0000305 | GUGACCUGAA-GCCUGGUUCGG  | : : ::::: : ::       | CCCCUACUUCGGAC-CAGGCU   |
| osa-miR166d-3p  | novel_circ_0000305 | GUGACCUGAA-GCCUGGUUCGG  | : : ::::: : ::       | CCCCUACUUCGGAC-CAGGCU   |
| osa-miR166a-3p  | novel_circ_0000305 | GUGACCUGAA-GCCUGGUUCGG  | : : ::::: : ::       | CCCCUACUUCGGAC-CAGGCU   |
| osa-miR166h-3p  | novel_circ_0000305 | GUGACCUGAA-GCCUGGUUCGG  | : : ::::: : ::       | CUCCUACUUCGGAC-CAGGCU   |
| osa-miR396c-5p  | novel_circ_0000403 | AAUUGUAAGA-GAGCUGUUGAA  | : : : ::::: : ::     | UUCAAGUUCUUUCGACAC-CUU  |
| osa-miR166g-3p  | novel_circ_0000305 | GUGACCUGAA-GCCUGGUUCGG  | : : ::::: : ::       | CUCCUACUUCGGAC-CAGGCU   |
| osa-miR6248     | novel_circ_0000130 | UGUUAUCCUCAUUCUAAAAUG   | : : : : ::::: : ::   | AUGAU-GGAGGUAG-GAGUUUAU |
| osa-miR2118o    | novel_circ_0000065 | UAGUUGAGGGAGG-AUCAG-GAG | ::: . :::: : :::::   | AUCCGAACCCUCCGUAGUCCUC  |
| osa-miR397b     | novel_circ_0000869 | AAUGGAA-GCUGCCCUCAAUAA  | : : : : :::: : ::::: | GUAGUUGCGACGUG-AGUUAAU  |
| osa-miR435      | novel_circ_0000294 | AAAACAUCAAUACCGGAUUA    | : : : ::::: : ::     | AGUUGAGGUUAUGCCUAUU     |
| osa-miR166c-5p  | novel_circ_0000449 | CUCAAACCAGGCGAAUGUUCU   | ::: : ::::: : ::     | GAGCCUGGUCUGUUGUAAGG    |
| osa-miR2928     | novel_circ_0000696 | CUGCAAAAUCUC-UCUUCUU    | : : ::::: : ::::     | GUUGUUUUACAGCAGAAGAA    |
| osa-miR166c-3p  | novel_circ_0000305 | GUGACCUGAA-GCCUGGUUCGG  | : : ::::: : ::       | CCCCUACUUCGGAC-CAGGCU   |
| osa-miR3982-5p  | novel_circ_0000426 | AUUGUUGUCUGCGUG-GAACAC  | ::::: : ::::: : ::   | UAACAACGGAUGCAC-CUCGCG  |
| osa-miR5152-5p  | novel_circ_0000539 | AGAAAUC-UGC UUAUUUCUAU  | : : : : ::::: : ::   | UCU-CUAGUACGGAUAGGGAUG  |
| osa-miR2925     | novel_circ_0000007 | CCGCAGCCUGUGGUCGCCG     | : : : ::::: : ::     | UGCUCGGGCGCCGGCGGU      |
| osa-miR2925     | novel_circ_0000257 | CCGGCGCCCGCGGCCGCGU     | : : : ::::: : ::     | UGCUCGGGCGCCGGCGGU      |
| osa-miR166l-5p  | novel_circ_0000454 | UCUUGAACAUAGGCAACAGUCCG | ::::: : ::::: : ::   | GGAACUUG-GUCUGUUGUAGG   |
| osa-miR167b     | novel_circ_0000714 | CUGCUCGUGCUCGG-CAGCUUCA | : : : : :::: : ::::: | AUCUAGUACGA-CCGUCGAAGU  |
| osa-miR167a-5p  | novel_circ_0000714 | CUGCUCGUGCUCGG-CAGCUUCA | : : : : :::: : ::::: | AUCUAGUACGA-CCGUCGAAGU  |
| osa-miR5339     | novel_circ_0000078 | UCAGAGAUGGAGUCU-CUAUCUA | : : : : : :::::      | AGACUCU-UCUAAGAGAUAGAC  |
| osa-miR167c-5p  | novel_circ_0000714 | CUGCUCGUGCUCGG-CAGCUUCA | : : : : : :::::      | AUCUAGUACGA-CCGUCGAAGU  |

|                |                                      |                              |                 |                             |
|----------------|--------------------------------------|------------------------------|-----------------|-----------------------------|
| osa-miR2093-5p | novel_circ_0000490                   | UGUA-UUUGAAUAAUGCAC          | :: :: :::::     | ACAAGAAGGUUAAUACGUG         |
| osa-miR2926    | novel_circ_0000577                   | GUCGCCAACGUCGCGACUC          | : :::::         | UCGUGGUUGCAGCUGCUGGA        |
| osa-miR166h-3p | novel_circ_0000305_junc-<br>tion_seq | GGUGACCUGAA-<br>GCCUGGUUCGG  | :: :: :::::     | CUCCUU-ACUUCGGAC-<br>CAGGCU |
| osa-miR396e-5p | novel_circ_0000150                   | CAGUACAGGAG-<br>GAGCCUGUGGG  | ::: :::: :::::  | GUCAAGUUCUU-UCG-<br>GACACCU |
| osa-miR166g-3p | novel_circ_0000305_junc-<br>tion_seq | GGUGACCUGAA-<br>GCCUGGUUCGG  | :: :: :::::     | CUCCUU-ACUUCGGAC-<br>CAGGCU |
| osa-miR166l-3p | novel_circ_0000305_junc-<br>tion_seq | GGUGACCUGAA-<br>GCCUGGUUCGG  | :: :: :::::     | UCCCUA-ACUUCGGAC-<br>CAGGCU |
| osa-miR5075    | novel_circ_0000750                   | GCGGUCGCGUGGCGACGGG-<br>GAU  | ::: :: :::::    | CGCCUGCCGCCCGUGCCU-<br>CUU  |
| osa-miR5536    | novel_circ_0000768                   | CGGUCAUGGUGGUCACUAC-<br>CAUU | : ::::: :::::   | GAUGGUAAUAC-<br>AGUGAUGGUAA |
| osa-miR2925    | novel_circ_0000210                   | ACGCGGUCCGCCGCCGCCG          | :: ::::: :::::  | UGCUCGGGCGCCGGCGGU          |
| osa-miR1436    | novel_circ_0000414                   | AUUAC-<br>CUUUGUCCCAAAUGU    | :: ::::: :::::  | UGAGGGAGGCAGGGUAUUA<br>A    |
| osa-miR166k-3p | novel_circ_0000305_junc-<br>tion_seq | GGUGACCUGAA-<br>GCCUGGUUCGG  | :: :: :::::     | UCCCUA-ACUUCGGAC-<br>CAGGCU |
| osa-miR166j-3p | novel_circ_0000305_junc-<br>tion_seq | GGUGACCUGAA-<br>GCCUGGUUCGG  | :: :: :::::     | CCCCUU-ACUUCGGAC-<br>CAGGCU |
| osa-miR167g    | novel_circ_0000714                   | CUGCUCGUGCUCGG-<br>CAGCUUCA  | : : ::::: ::::: | GUCUAGUACGA-<br>CCGUCGAAGU  |
| osa-miR167e-5p | novel_circ_0000714                   | CUGCUCGUGCUCGG-<br>CAGCUUCA  | : : ::::: ::::: | GUCUAGUACGA-<br>CCGUCGAAGU  |
| osa-miR166f    | novel_circ_0000305_junc-<br>tion_seq | GGUGACCUGAA-<br>GCCUGGUUCGG  | :: :: :::::     | CCCCUU-ACUUCGGAC-<br>CAGGCU |
| osa-miR166b-3p | novel_circ_0000305_junc-<br>tion_seq | GGUGACCUGAA-<br>GCCUGGUUCGG  | :: :: :::::     | CCCCUU-ACUUCGGAC-<br>CAGGCU |
| osa-miR166d-3p | novel_circ_0000305_junc-<br>tion_seq | GGUGACCUGAA-<br>GCCUGGUUCGG  | :: :: :::::     | CCCCUU-ACUUCGGAC-<br>CAGGCU |
| osa-miR166a-3p | novel_circ_0000305_junc-<br>tion_seq | GGUGACCUGAA-<br>GCCUGGUUCGG  | :: :: :::::     | CCCCUU-ACUUCGGAC-<br>CAGGCU |
| osa-miR6256    | novel_circ_0000750                   | UACGCCUACAAC-GACUAC-<br>UAC  | ::: ::::: ::::: | AUGUGGAUGUUGGCUCAU-<br>GAUG |
| osa-miR167d-5p | novel_circ_0000714                   | CUGCUCGUGCUCGG-<br>CAGCUUCA  | : : ::::: ::::: | GUCUAGUACGA-<br>CCGUCGAAGU  |
| osa-miR167f    | novel_circ_0000714                   | CUGCUCGUGCUCGG-<br>CAGCUUCA  | : : ::::: ::::: | GUCUAGUACGA-<br>CCGUCGAAGU  |
| osa-miR166c-3p | novel_circ_0000305_junc-<br>tion_seq | GGUGACCUGAA-<br>GCCUGGUUCGG  | :: :: :::::     | CCCCUU-ACUUCGGAC-<br>CAGGCU |
| osa-miR2925    | novel_circ_0000007                   | UCGACGCCCCGCGCCGCCG          | :: ::::: :::::  | UGCUCGGGCGCCGGCGGU          |
| osa-miR167h-5p | novel_circ_0000714                   | CUGCUCGUGCUCGG-<br>CAGCUUCA  | : : ::::: ::::: | GUCUAGUACGA-<br>CCGUCGAAGU  |
| osa-miR1440a   | novel_circ_0000243                   | UGGGGAGUGGUAAUUGAGCC         | ::: ::::: ::::: | UCCUCUCACCAUAAACUCGU        |
| osa-miR167i-5p | novel_circ_0000714                   | CUGCUCGUGCUCGG-<br>CAGCUUCA  | : : ::::: ::::: | GUCUAGUACGA-<br>CCGUCGAAGU  |
| osa-miR166e-3p | novel_circ_0000305                   | GUGACCUGAA-<br>GCCUGGUUCGG   | : : ::::: ::::: | CCCCUUACUUCGGACCAA-<br>GCU  |
| osa-miR5809    | novel_circ_0000007                   | CCUGUGGUCGCCGGCGGCCG         | ::: ::::: ::::: | CGACACCAGCGCCCGUGCU         |
| osa-miR5809    | novel_circ_0000750                   | GAGGCGGUCGUGGCGACGG          | : : ::::: ::::: | CGACACCAGCGCCCGUGCU         |
| osa-miR167j    | novel_circ_0000714                   | CUGCUCGUGCUCGG-<br>CAGCUUCA  | : : ::::: ::::: | GUCUAGUACGA-<br>CCGUCGAAGU  |
| osa-miR5499    | novel_circ_0000433                   | GUCCA-ACUGAUUCUCCUUC         | ::: : :::::     | AAGGUAAUUGCU-<br>AAGAAGGAAG |
| osa-miR5075    | novel_circ_0000210                   | GCCAACGGCGGCGGCG-<br>GAGGA   | :: ::::: :::::  | CGCCUGCCGCCCGUGCCU-<br>CUU  |

|                |                                      |                             |        |                             |
|----------------|--------------------------------------|-----------------------------|--------|-----------------------------|
| osa-miR5499    | novel_circ_0000319                   | UUUC-UGACGAUUCUUUCUUU       | ... .. | AAGGUAUUGCU-<br>AAGAAGGAAG  |
| osa-miR5075    | novel_circ_0000007                   | GCGG-CGGCGGCGGCGGGGAG       | ... .. | CGCCUGCCGCCGUGCCU-<br>CUU   |
| osa-miR166e-3p | novel_circ_0000305_junc-<br>tion_seq | GGUGACCUGAA-<br>GCCUGGUUCGG | ... .. | CCCCUU-ACUUCGGACCAA-<br>GCU |

**Table S5.** List of the predicted targets having a putative defense modulatory role in rice.

| circRNA                   | miRNA          | Putative mRNA | Putative function                          |
|---------------------------|----------------|---------------|--------------------------------------------|
| <b>IR-IR56 vs IR56-CK</b> |                |               |                                            |
| novel_circ_0000490        | osa-miR166a-5p | Os12g06920    | NBS-LRR disease resistance                 |
| novel_circ_0000454        | osa-miR166l-5p | Os04g28210    | disease resistance                         |
| novel_circ_0000305        | osa-miR166m    | Os04g49890    | multidrug resistance-associated            |
| novel_circ_0000714        | osa-miR167a-5p | Os02g50330    | resistance                                 |
| novel_circ_0000714        | osa-miR167d-5p | Os11g10550    | NBS-LRR disease resistance                 |
| novel_circ_0000093        | osa-miR1850.3  | Os03g38330    | disease resistance                         |
| novel_circ_0000189        | osa-miR1862f   | Os01g48680    | cell death                                 |
| novel_circ_0000319        | osa-miR396c-3p | Os01g06730    | disease resistance                         |
| novel_circ_0000536        | osa-miR172d-5p | Os01g24460    | R protein                                  |
| novel_circ_0000074        | osa-miR5788    | Os02g06450    | coiled-coil domain-containing<br>protein   |
| novel_circ_0000576        | osa-miR535-3p  | Os05g30870    | defense                                    |
| novel_circ_0000869        | osa-miR397b    | Os01g42710    | disease resistance                         |
| circRNA                   | miRNA          | Putative mRNA | Putative function                          |
| <b>IR-TN1 vs IR56-CK</b>  |                |               |                                            |
| novel_circ_0000490        | osa-miR166a-5p | Os02g51810    | resistance to SSB                          |
| novel_circ_0000319        | osa-miR396c-3p | Os11g24170    | CC-NBS-LRR protein,                        |
| novel_circ_0000454        | osa-miR166l-5p | Os01g69080    | disease resistance                         |
| novel_circ_0000714        | osa-miR167a-5p | Os12g29290    | disease resistance                         |
| novel_circ_0000490        | osa-miR166a-5p | Os11g31500    | Durable Resistance to Rice stripe<br>viru  |
| novel_circ_0000714        | osa-miR167d-5p | Os01g67580    | multidrug resistance-associated<br>protein |
| novel_circ_0000403        | osa-miR396a-5p | Os03g08900    | disease resistance                         |
| novel_circ_0000403        | osa-miR396c-5p | Os03g08900    | disease resistance                         |
| novel_circ_0000150        | osa-miR396e-5p | Os11g40590    | cell death                                 |
| novel_circ_0000074        | osa-miR5788    | Os02g06450    | coiled-coil domain-containing              |
| novel_circ_0000150        | osa-miR396g    | Os12g10340    | NBS-LRR type resistance                    |

**Table S6.** List of the primers used in qPCR for miRNA and target gene expression analysis.

| Genes              | Forward primer (5'-3')    | Reverse primer (5'-3')  |
|--------------------|---------------------------|-------------------------|
| novel_circ_0000503 | TTACTACCAGCACCGTGTCG      | GGTGGCCAGCTCAACCTTAT    |
| novel_circ_0000714 | GCAGGATAGGCCATCTGGAG      | GTAGCTCAGCATCCGTGGAC    |
| novel_circ_0000305 | GGCCATCTGGAGTTCTGACG      | CCGTGATCTTCACGTCCGAA    |
| novel_circ_0000063 | AGGACCGAACGCCAATTGTA      | TCGTTACCTCCACGTATCC     |
| novel_circ_0000270 | ACAAAATTCCTGGTCCGGCA      | GCATCAACACTTTGGAGAGTACA |
| novel_circ_0000074 | AACGATCGATCCAGCGTCAC      | ATCCCCGAGCATCACACTTC    |
| novel_circ_0000271 | CAGTTCCGGACACCCAATCC      | TTCAGGAATCCCTTCTGGCTG   |
| novel_circ_0000830 | GTGGATCAACAGCAGTCACG      | CAGCATCTCGTGTCCCATTT    |
| novel_circ_0000480 | CCGCGTCGGATTTTACTGC       | AGTACACTCTCGGTCTTGGC    |
| novel_circ_0000889 | AAATGGTGGATGACCCCGCT      | CCCTGGATACATCACACCGA    |
| novel_circ_0000559 | TCTCTCGGCTCCGATCTCAA      | CCCTCAGGTGCCATCCATC     |
| novel_circ_0000490 | CAAGGAGAGGTTGGAGGTCT      | CACCGCTTTGCGTAGGCTAT    |
| novel_circ_0000868 | ATTGACCGGACGGCATAACAC     | TGCGTCATCTATCCTTCTCGC   |
| novel_circ_0000089 | CTGCATGTTGTTTGAAGACCCA    | CCCATCCACTTCAGGCCTTC    |
| novel_circ_0000522 | GCAATGTGTCCCAATGATGGTT    | CCAGTCCAAAGCTCAATAGGC   |
| novel_circ_0000801 | AAGGTCCAAACCCGCTCTTC      | TTCTCCCTCGACCCAGATGT    |
| novel_circ_0000625 | TGTTGTACGTGTCATTGATGCT    | AGTGACAGTCCAGAAAATGC    |
| novel_circ_0000103 | TGTCAGATGGGGACGTTGAC      | CCTGCCATGCTTCCATTTGT    |
| novel_circ_0000335 | ACCTTACCAGCTTCTTGCAGT     | GTAGAGCTTTGGCTTGGGCT    |
| novel_circ_0000749 | GTGATGATCGGGGGTGTGTCAT    | TTCCCGCAAACCTAGCAGCAT   |
| novel_circ_0000101 | AGAGTTGGTCAACCTGAGTGTC    | GCTCAGGGTATGGAGTGGAC    |
| novel_circ_0000138 | CCTTCTCCCTCCCAAAGAG       | ATTCTGACGGCAGGAAACGC    |
| novel_circ_0000273 | CAGTTCCGGACACCCAATCC      | TTCAGGAATCCCTTCTGGCTG   |
| novel_circ_0000093 | ACATGAGGTTGTGCGGATCG      | GGAGAAACATATGCAGCGAGC   |
| novel_circ_0000189 | GGCATTGGCCAACACAATCA      | ACGCAGATGCAGCCTATGTT    |
| novel_circ_0000536 | CTCCACACCTCACCATGTC       | AGCAGCCGAGCGATTATTGA    |
| novel_circ_0000576 | GCCGGACAGGGAGGGCCC        | TGCACCCCGGGCTCGTCG      |
| novel_circ_0000869 | CCACAGATTGTCTTGAATGAT     | TTTTGCCGAACGGCTAATTGAT  |
| novel_circ_0000319 | TTGAGGGTTGTGAACCCTCTTCA   | CTGTTAATGGTATAATGCCCTCT |
| novel_circ_0000454 | GAAAAATCGTCAGGTCACCTGGAG  | AGAAGTTGAGTTTGCTTCTGT   |
| novel_circ_0000403 | ACCCTGACATCAACGACTTCCAAC  | AATTACATTGTTGGTTGTTATCT |
| novel_circ_0000150 | CGGTGCTTCTGGACTCGGCGAGCAA | AGACCGAGGCCCTTGGCGGA    |
| qmiR166a-5p        | CGCGGGAATGTTGTCTGGT       |                         |
| qmiR166l-5p        | CGCGGGATTGTTGTCTGGT       |                         |
| qmiR166m           | GCGTCGGACCAGGCTTCA        |                         |
| qmiR167a-5p        | GCGTGAAGCTGCCAGCAT        |                         |
| qmiR167d-5p        | GCGTGAAGCTGCCAGCAT        |                         |
| qmiR1850.3         | GCGCGCTGTTTAGTTCACATC     |                         |
| qmiR1862f          | GCGCGATGAGGTTGGTTTA       |                         |
| qmiR396c-3p        | CGCGGGTCAAGAAAGCTGT       |                         |
| qmiR172d-5p        | GCGGCAGCACCATCAAG         |                         |
| qmiR5788           | GCGCGTGGATGTGACATACT      |                         |
| qmiR535-3p         | GCGGTGCTTTCTCCCGTT        |                         |
| qmiR397b           | GCGGTTATTGAGTGCAGC        |                         |
| qmiR396g           | GCGGTCCACAGGCTTTCTT       |                         |
| qmiRNA-R           | AGTGCAGGGTCCGAGGTATT      |                         |
| miRU6              | TACAGATAAGATTAGCATGGCCCC  | GGACCATTCTCGATTGTACGTG  |

|                      |                           |                        |
|----------------------|---------------------------|------------------------|
| qPCR-LOC_Os12g06920  | GAGATTGGTGCCTGGGTCA       | AGGCCATTTACCGGCATCAA   |
| qPCR-LOC_Os04g28210  | GGCTCGCCTACAATCTCCTC      | ATGAGAAATCGGGCAGCACA   |
| qPCR-LOC_Os03g38330  | GTCAACCTCCGCCATCTCAA      | TGGTGTAGCTCGGCAACATT   |
| qPCR-LOC_Os01g48680  | TTGCAAGTTCGGCGTTTCAG      | ATCTGCAAACCAAGGGAGCA   |
| qPCR-LOC_Os01g06730  | ATTGGGCATGGGAGAACTGG      | GGAAGTGGTATTGGCCCCCTC  |
| qPCR-LOC_Os01g24460  | TTGGTTGTAGTAGCCCTGCG      | AAATGGCCAGAGGGAGCAAT   |
| qPCR-LOC_Os05g30870  | GCAATGTGTTTGCAGGAGCA      | ATTGCTCCGACTGTGCTGAA   |
| qPCR-LOC_Os01g42710  | ATGCTTTGGCAGCAACAGTG      | GGCGCTTCTTGCAATTATGGG  |
| qPCR-LOC_Os02g51810  | CTGCCAACCACAGCTGGATA      | TGACAGCAGCCTGAAAGTGT   |
| qPCR-LOC_Os11g24170  | TAGAGCGGATGTGTGAAGCC      | CACCTTTGGCTCAGTGGAGT   |
| qPCR-LOC_Os01g69080  | ACTCTCGATGGTGTCCGAGA      | CATGCCTGTTCTCCTCAGCA   |
| qPCR-LOC_Os12g29290  | GGGTGGGCTGAATAGTCTCG      | CTCCTCGAATTGTGGGCAGT   |
| qPCR-LOC_Os01g67580  | CATATGGCGGAGCTCTCGTT      | ACTTGTTCTGCTCTCAGC     |
| qPCR-LOC_Os03g08900  | GCACCTACTACCTCATCGGC      | GAATTAGCGTCTGCACTGCG   |
| qPCR-LOC_Os11g40590  | GTGTTGGCAAAGCTGAGTCG      | CCTTTGGAATTGCAGGTGGC   |
| qPCR-LOC_Os02g06450  | AGGCCGCCAAGAAGGATTAC      | CACCTTTCTTGAGACCGGCG   |
| Os02g53690 (OsGRF1)  | AAAGAGGACGACGATGAGAAAGAG  | GCCCAGGAGGAAGCAGTG     |
| Os06g10310 (OsGRF2)  | TACGGACGGCAAGAAGTG        | GGCATTTCACAGGCTTTC     |
| Os04g51190 (OsGRF3)  | CAATGCTGCGTCTTACTC        | AATGTGGAGGTCTGAGAAG    |
| Os02g47280 (OsGRF4)  | CATCTGTTGTGCGTTCTG        | GCAATAGCAGGGTAAAGAG    |
| Os06g02560 (OsGRF5)  | TTCTTCTCAGGAGCATCAG       | GTTCAAGGTGGGAGTAGG     |
| Os03g51970 (OsGRF6)  | CCTCGCTATCAACCATCAG       | GCACTTGTTCACTCTCATTATG |
| Os12g29980 (OsGRF7)  | TTGGATCAGGTGGCTATC        | TTGTGTTGGTGTGAATGG     |
| Os11g35030 (OsGRF8)  | GCAAGAGCAAGAGCAAGATG      | GCAAGAGCAAGAGCAAGATG   |
| Os03g47140 (OsGRF9)  | GCTCATTGCCATCTTCTGTC      | GTTTCGCCATTGTCTCTGTC   |
| Os02g45570 (OsGRF10) | TGCTCATCTACCGCTACTTC      | CGACGCTCTTCCAGATGG     |
| Os04g24190 (OsGRF11) | TGCCTACTCATCTCGTCTTC      | GTTCTGGTTCTGGGTTCTTTC  |
| Os04g48510 (OsGRF12) | TCAAGAAAGCCTATGGAAGCCTCTG | TGGCGACGGTGTGGAGTG     |
| qOs04g57610-OsARF12  | CCCGGATATCGGTTGGGATG      | CCCATATACCTGCGAACGCT   |
| qOs03g15880-OsCOI2   | TTGTGCGCAATTGTGCAAGG      | CAAAGGAACCACCGGCAAAG   |
| qOs02g41890-OsPSKR1  | ATCCGTGTTCTCCGGTTCAC      | TTGTGCAGTTCCCAAACCCT   |
| qOs01g03750-MHZ4     | GCCGTCCTCCCTTTCTACAC      | GTCGGGAGTCCAGGATAGGT   |
| qOs01g13520-OsARF1   | TGGATGGAGCACGTTTGTGA      | CTGTTTCTGCACAAGACGCC   |
| qOs01g08320-OsIAA1   | GACGTACGAGGACAAGGACG      | TTTCATGAGACGAAGGCGCT   |
| qOs11g03370-ONAC045  | AGCCACCAAGGAGGGATACT      | CTCCATAGCTGGTAGGCTGC   |
| qOs04g56850-OsARF11  | CTACGACCCCATGAGATGGC      | CAAGGTCGACGAAGGGAACA   |
| qOs01g09550-SNAC3    | AAGCTTGACAGGAGGTCTGC      | GGCTGGTAAGGCCATTCTGT   |
| qOs02g06910-OsARF6   | ACTACTCCGGGCTGCTTAGA      | TTCACAAAGGTTGCATGCGG   |
| qOs12g41950-OsARF25  | CTAGGGCAGGTGCAGTTTCA      | GCAGCTGCTGAGTGTTATGC   |
| qOs01g53200-OsYUCCA3 | GAGCTTCCCCTCATGCCTTT      | ATCCCAAACCTTGACGCGTA   |
| OsUbiquitin          | CCAGTAAGTCCTCAGCCATGGAG   | GGACACAATGATTAGGGATC   |
